# Supplementary material for: Intermolecular non-covalent interactions in the organic perrhenates crystal structures: from theory to practice
Source: Royal Society of Chemistry journal article supplement (doi:10.1039/d4ce00951g), 2024-01-01
Supplement: d4ce00951g1.pdf [file d4ce00951g1.pdf]

**Electronic supplementary materials for the paper**

**Intermolecular Non-Covalent Interactions In The Organic Perrhenates Crystal Structures: From Theory To Practice**

**Anton P. Novikov\***, Anastasiia V. Sitanskaia, Mikhail A. Volkov, Iurii M. Nevolin, Mikhail S. Grigoriev

*Frumkin Institute of Physical Chemistry and Electrochemistry, Russian Academy of Sciences, 31 Bldg 4, Leninsky prosp., Moscow, 119071, Russian Federation*

\* Correspondence: [tony.novickoff@yandex.ru](mailto:tony.novickoff@yandex.ru)

## Single-Crystal X-ray analysis

**Table S1.** Crystal data and structure refinement for 1-5.

| Identification code                  | 1                                                               | 2a                                                             | 2b                                                             | 3                                                                | 4                                                 | 5                                                 |
|--------------------------------------|-----------------------------------------------------------------|----------------------------------------------------------------|----------------------------------------------------------------|------------------------------------------------------------------|---------------------------------------------------|---------------------------------------------------|
| Organic fragment                     | 3,5-Dimethylpyrazolium                                          | 3-Methylpyrazolium                                             | 3-Methylpyrazolium                                             | Picolinium                                                       | Piperidinium                                      | Pyrrolidinium                                     |
| CCDC number                          | 2384438                                                         | 2384443                                                        | 2384441                                                        | 2384445                                                          | 2384437                                           | 2384446                                           |
| Empirical formula                    | C <sub>5</sub> H <sub>10</sub> N <sub>2</sub> O <sub>4</sub> Re | C <sub>4</sub> H <sub>7</sub> N <sub>2</sub> O <sub>4</sub> Re | C <sub>4</sub> H <sub>7</sub> N <sub>2</sub> O <sub>4</sub> Re | C <sub>12</sub> H <sub>11</sub> N <sub>2</sub> O <sub>8</sub> Re | C <sub>5</sub> H <sub>12</sub> NO <sub>4</sub> Re | C <sub>4</sub> H <sub>10</sub> NO <sub>4</sub> Re |
| Formula weight                       | 348.35                                                          | 333.32                                                         | 333.32                                                         | 497.43                                                           | 336.36                                            | 322.33                                            |
| Temperature/K                        | 100(2)                                                          | 100(2)                                                         | 100(2)                                                         | 100(2)                                                           | 100(2)                                            | 100(2)                                            |
| Crystal system                       | orthorhombic                                                    | monoclinic                                                     | triclinic                                                      | monoclinic                                                       | triclinic                                         | monoclinic                                        |
| Space group                          | Pnma                                                            | P2 <sub>1</sub> /c                                             | P-1                                                            | P2 <sub>1</sub> /c                                               | P1                                                | P2 <sub>1</sub> /c                                |
| a/Å                                  | 12.086(2)                                                       | 5.4022(3)                                                      | 7.0126(9)                                                      | 10.7017(9)                                                       | 5.807(2)                                          | 5.4974(3)                                         |
| b/Å                                  | 8.5629(14)                                                      | 14.7984(9)                                                     | 8.0573(10)                                                     | 11.3642(9)                                                       | 6.087(2)                                          | 8.7838(6)                                         |
| c/Å                                  | 8.3490(13)                                                      | 9.4457(6)                                                      | 14.2499(17)                                                    | 12.4987(11)                                                      | 6.157(2)                                          | 15.4679(10)                                       |
| α/°                                  | 90                                                              | 90                                                             | 99.816(5)                                                      | 90                                                               | 95.814(11)                                        | 90                                                |
| β/°                                  | 90                                                              | 94.184(3)                                                      | 91.370(5)                                                      | 106.006(3)                                                       | 94.570(11)                                        | 96.576(3)                                         |
| γ/°                                  | 90                                                              | 90                                                             | 93.454(5)                                                      | 90                                                               | 100.825(11)                                       | 90                                                |
| Volume/Å <sup>3</sup>                | 864.1(2)                                                        | 753.11(8)                                                      | 791.45(17)                                                     | 1461.1(2)                                                        | 211.57(12)                                        | 742.00(8)                                         |
| Z                                    | 4                                                               | 4                                                              | 4                                                              | 4                                                                | 1                                                 | 4                                                 |
| ρ <sub>calc</sub> /g/cm <sup>3</sup> | 2.678                                                           | 2.940                                                          | 2.797                                                          | 2.261                                                            | 2.640                                             | 2.885                                             |
| μ/mm <sup>-1</sup>                   | 14.042                                                          | 16.104                                                         | 15.324                                                         | 8.362                                                            | 14.328                                            | 16.335                                            |
| F(000)                               | 644.0                                                           | 608.0                                                          | 608.0                                                          | 944.0                                                            | 156.0                                             | 592.0                                             |
| Crystal size/mm <sup>3</sup>         | 0.13 × 0.06 × 0.04                                              | 0.07 × 0.04 × 0.03                                             | 0.16 × 0.08 × 0.06                                             | 0.1 × 0.07 × 0.06                                                | 0.08 × 0.05 × 0.04                                | 0.16 × 0.12 × 0.1                                 |
| Radiation                            | MoKα (λ = 0.71073)                                              | MoKα (λ = 0.71073)                                             | MoKα (λ = 0.71073)                                             | MoKα (λ = 0.71073)                                               | MoKα (λ = 0.71073)                                | MoKα (λ = 0.71073)                                |
| 2θ range for data collection/°       | 8.254 to 59.986                                                 | 8.654 to 60                                                    | 8.3 to 50                                                      | 8.194 to 59.998                                                  | 8.904 to 59.998                                   | 8.648 to 64.996                                   |
| Index ranges                         | -16 ≤ h ≤ 16, -12 ≤ k ≤ 11, -11 ≤ l ≤ 11                        | -7 ≤ h ≤ 7, -20 ≤ k ≤ 20, -13 ≤ l ≤ 13                         | -8 ≤ h ≤ 8, -9 ≤ k ≤ 9, -16 ≤ l ≤ 16                           | -15 ≤ h ≤ 15, -15 ≤ k ≤ 15, -17 ≤ l ≤ 17                         | -8 ≤ h ≤ 8, -8 ≤ k ≤ 8, -8 ≤ l ≤ 8                | -8 ≤ h ≤ 8, -13 ≤ k ≤ 13, -23 ≤ l ≤ 23            |
| Reflections collected                | 14162                                                           | 22667                                                          | 9853                                                           | 25068                                                            | 4129                                              | 39441                                             |
| Independent reflections              | 1326 [R <sub>int</sub> =                                        | 2192 [R <sub>int</sub> =                                       | 2772 [R <sub>int</sub> =                                       | 4241 [R <sub>int</sub> =                                         | 2042 [R <sub>int</sub> =                          | 2684 [R <sub>int</sub> =                          |

|                                                |                                                            |                                                            |                                                            |                                                            |                                                            |                                                            |
|------------------------------------------------|------------------------------------------------------------|------------------------------------------------------------|------------------------------------------------------------|------------------------------------------------------------|------------------------------------------------------------|------------------------------------------------------------|
|                                                | 0.0852,<br>R <sub>sigma</sub> =<br>0.0422]                 | 0.0857,<br>R <sub>sigma</sub> =<br>0.0403]                 | 0.0742,<br>R <sub>sigma</sub> =<br>0.0769]                 | 0.1143,<br>R <sub>sigma</sub> =<br>0.0899]                 | 0.0248,<br>R <sub>sigma</sub> =<br>0.0453]                 | 0.0418,<br>R <sub>sigma</sub> =<br>0.0162]                 |
| Data/restraints/p<br>arameters                 | 1326/0/65                                                  | 2192/0/10<br>8                                             | 2772/0/20<br>2                                             | 4241/3/21<br>8                                             | 2042/3/96                                                  | 2684/0/98                                                  |
| Goodness-of-fit<br>on F <sup>2</sup>           | 1.064                                                      | 1.060                                                      | 1.031                                                      | 1.005                                                      | 1.011                                                      | 1.293                                                      |
| Final R indexes<br>[I>=2σ (I)]                 | R <sub>1</sub> =<br>0.0274,<br>wR <sub>2</sub> =<br>0.0531 | R <sub>1</sub> =<br>0.0293,<br>wR <sub>2</sub> =<br>0.0545 | R <sub>1</sub> =<br>0.0464,<br>wR <sub>2</sub> =<br>0.0929 | R <sub>1</sub> =<br>0.0438,<br>wR <sub>2</sub> =<br>0.0764 | R <sub>1</sub> =<br>0.0187,<br>wR <sub>2</sub> =<br>0.0333 | R <sub>1</sub> =<br>0.0197,<br>wR <sub>2</sub> =<br>0.0388 |
| Final R indexes<br>[all data]                  | R <sub>1</sub> =<br>0.0376,<br>wR <sub>2</sub> =<br>0.0566 | R <sub>1</sub> =<br>0.0429,<br>wR <sub>2</sub> =<br>0.0597 | R <sub>1</sub> =<br>0.0661,<br>wR <sub>2</sub> =<br>0.1002 | R <sub>1</sub> =<br>0.0723,<br>wR <sub>2</sub> =<br>0.0871 | R <sub>1</sub> =<br>0.0187,<br>wR <sub>2</sub> =<br>0.0333 | R <sub>1</sub> =<br>0.0218,<br>wR <sub>2</sub> =<br>0.0392 |
| Largest diff.<br>peak/hole / e Å <sup>-3</sup> | 1.06/-1.32                                                 | 1.79/-1.83                                                 | 1.50/-1.33                                                 | 1.03/-1.35                                                 | 0.86/-0.92                                                 | 1.74/-2.36                                                 |
| Flack parameter                                |                                                            |                                                            |                                                            |                                                            | 0.07(2)                                                    |                                                            |

**Table S2.** Crystal data and structure refinement for **6-10**.

| Identification code                | <b>6</b>                                                           | <b>7</b>                                                           | <b>8</b>                                                           | <b>9</b>                                                           | <b>10</b>                                                                       |
|------------------------------------|--------------------------------------------------------------------|--------------------------------------------------------------------|--------------------------------------------------------------------|--------------------------------------------------------------------|---------------------------------------------------------------------------------|
| Organic fragment                   | Pyrazinium                                                         | Triazolium                                                         | Pyrimidiniu<br>m                                                   | Pyridaziniu<br>m                                                   | Piperaziniu<br>m                                                                |
| CCDC number                        | 2384444                                                            | 2384439                                                            | 2384442                                                            | 2252646                                                            | 2384440                                                                         |
| Empirical formula                  | C <sub>4</sub> H <sub>5</sub> N <sub>2</sub> O <sub>4</sub> R<br>e | C <sub>2</sub> H <sub>4</sub> N <sub>3</sub> O <sub>4</sub> R<br>e | C <sub>4</sub> H <sub>5</sub> N <sub>2</sub> O <sub>4</sub> R<br>e | C <sub>4</sub> H <sub>5</sub> N <sub>2</sub> O <sub>4</sub> R<br>e | C <sub>4</sub> H <sub>12</sub> N <sub>2</sub> O <sub>8</sub><br>Re <sub>2</sub> |
| Formula weight                     | 331.30                                                             | 320.28                                                             | 331.30                                                             | 331.30                                                             | 588.56                                                                          |
| Temperature/K                      | 100(2)                                                             | 100(2)                                                             | 100.15                                                             | 100(2)                                                             | 100(2)                                                                          |
| Crystal system                     | monoclinic                                                         | monoclinic                                                         | monoclinic                                                         | monoclinic                                                         | triclinic                                                                       |
| Space group                        | P2 <sub>1</sub> /n                                                 | P2 <sub>1</sub> /m                                                 | P2 <sub>1</sub> /c                                                 | P2 <sub>1</sub> /m                                                 | P-1                                                                             |
| a/Å                                | 5.8384(5)                                                          | 5.1704(2)                                                          | 9.8128(3)                                                          | 5.3382(3)                                                          | 6.2945(4)                                                                       |
| b/Å                                | 8.7977(7)                                                          | 12.0115(6)                                                         | 9.7587(3)                                                          | 12.9726(8)                                                         | 7.3292(4)                                                                       |
| c/Å                                | 14.3012(12)                                                        | 9.9500(5)                                                          | 7.4027(2)                                                          | 10.5955(7)                                                         | 7.3349(4)                                                                       |
| α/°                                | 90                                                                 | 90                                                                 | 90                                                                 | 90                                                                 | 115.398(2)                                                                      |
| β/°                                | 99.293(2)                                                          | 94.583(1)                                                          | 101.976(1)                                                         | 101.710(2)                                                         | 107.627(2)                                                                      |
| γ/°                                | 90                                                                 | 90                                                                 | 90                                                                 | 90                                                                 | 90.178(2)                                                                       |
| Volume/Å <sup>3</sup>              | 724.93(10)                                                         | 615.96(5)                                                          | 693.45(4)                                                          | 718.47(8)                                                          | 287.83(3)                                                                       |
| Z                                  | 4                                                                  | 4                                                                  | 4                                                                  | 4                                                                  | 1                                                                               |
| ρ <sub>calc</sub> /cm <sup>3</sup> | 3.036                                                              | 3.454                                                              | 3.173                                                              | 3.063                                                              | 3.395                                                                           |
| μ/mm <sup>-1</sup>                 | 16.729                                                             | 19.686                                                             | 17.488                                                             | 16.879                                                             | 21.038                                                                          |
| F(000)                             | 600.0                                                              | 576.0                                                              | 600.0                                                              | 600.0                                                              | 264.0                                                                           |
| Crystal size/mm <sup>3</sup>       | 0.08 × 0.08<br>× 0.06                                              | 0.2 × 0.14 ×<br>0.13                                               | 0.15 × 0.11<br>× 0.1                                               | 0.13 × 0.1 ×<br>0.1                                                | 0.08 × 0.06<br>× 0.04                                                           |
| Radiation                          | MoKα (λ =<br>0.71073)                                                           |
| 2θ range for data<br>collection/°  | 8.456 to<br>59.998                                                 | 8.218 to<br>59.982                                                 | 8.354 to<br>69.972                                                 | 8.406 to<br>64.996                                                 | 8.538 to<br>59.996                                                              |
| Index ranges                       | -8 ≤ h ≤ 7, -<br>12 ≤ k ≤ 12,<br>-20 ≤ l ≤ 20                      | -7 ≤ h ≤ 7, -<br>16 ≤ k ≤ 16,<br>-11 ≤ l ≤ 13                      | -15 ≤ h ≤ 15,<br>-15 ≤ k ≤ 15,<br>-11 ≤ l ≤ 11                     | -8 ≤ h ≤ 8, -<br>19 ≤ k ≤ 19,<br>-16 ≤ l ≤ 16                      | -8 ≤ h ≤ 8, -<br>10 ≤ k ≤ 10,<br>-10 ≤ l ≤ 10                                   |

|                                                |                                                                  |                                                                  |                                                                  |                                                                  |                                                                  |
|------------------------------------------------|------------------------------------------------------------------|------------------------------------------------------------------|------------------------------------------------------------------|------------------------------------------------------------------|------------------------------------------------------------------|
| Reflections collected                          | 7861                                                             | 10224                                                            | 37290                                                            | 16953                                                            | 5275                                                             |
| Independent reflections                        | 2094 [ $R_{\text{int}} = 0.0401$ , $R_{\text{sigma}} = 0.0403$ ] | 1867 [ $R_{\text{int}} = 0.0444$ , $R_{\text{sigma}} = 0.0303$ ] | 3041 [ $R_{\text{int}} = 0.0385$ , $R_{\text{sigma}} = 0.0168$ ] | 2681 [ $R_{\text{int}} = 0.0375$ , $R_{\text{sigma}} = 0.0238$ ] | 1664 [ $R_{\text{int}} = 0.0315$ , $R_{\text{sigma}} = 0.0393$ ] |
| Data/restraints/parameters                     | 2094/0/104                                                       | 1867/1/107                                                       | 3041/1/104                                                       | 2681/0/113                                                       | 1664/0/80                                                        |
| Goodness-of-fit on $F^2$                       | 1.061                                                            | 1.163                                                            | 1.093                                                            | 1.074                                                            | 1.055                                                            |
| Final R indexes [ $I \geq 2\sigma(I)$ ]        | $R_1 = 0.0269$ , $wR_2 = 0.0526$                                 | $R_1 = 0.0208$ , $wR_2 = 0.0488$                                 | $R_1 = 0.0143$ , $wR_2 = 0.0299$                                 | $R_1 = 0.0154$ , $wR_2 = 0.0302$                                 | $R_1 = 0.0218$ , $wR_2 = 0.0358$                                 |
| Final R indexes [all data]                     | $R_1 = 0.0347$ , $wR_2 = 0.0549$                                 | $R_1 = 0.0223$ , $wR_2 = 0.0495$                                 | $R_1 = 0.0171$ , $wR_2 = 0.0305$                                 | $R_1 = 0.0199$ , $wR_2 = 0.0311$                                 | $R_1 = 0.0249$ , $wR_2 = 0.0367$                                 |
| Largest diff. peak/hole / $e \text{ \AA}^{-3}$ | 1.37/-1.32                                                       | 1.87/-1.51                                                       | 1.19/-1.01                                                       | 1.12/-1.24                                                       | 1.03/-1.19                                                       |

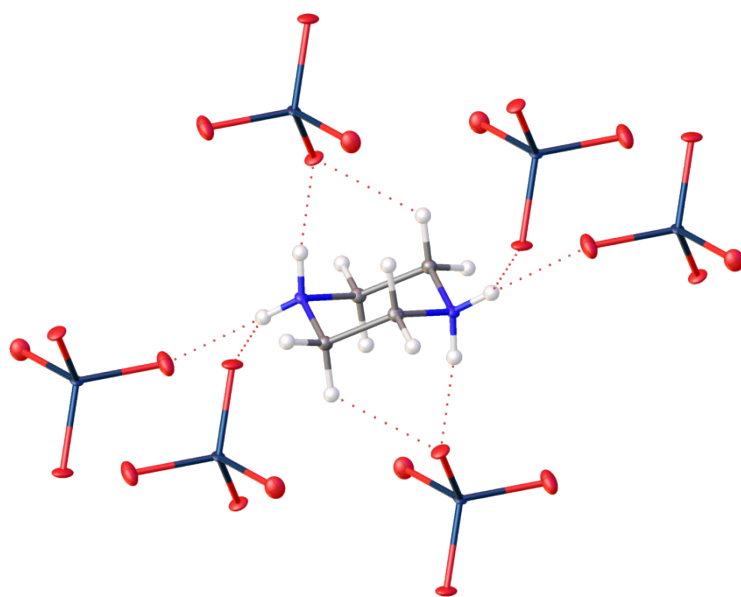

**Figure S1.** Fragment of the hydrogen bond system of structure **10**.

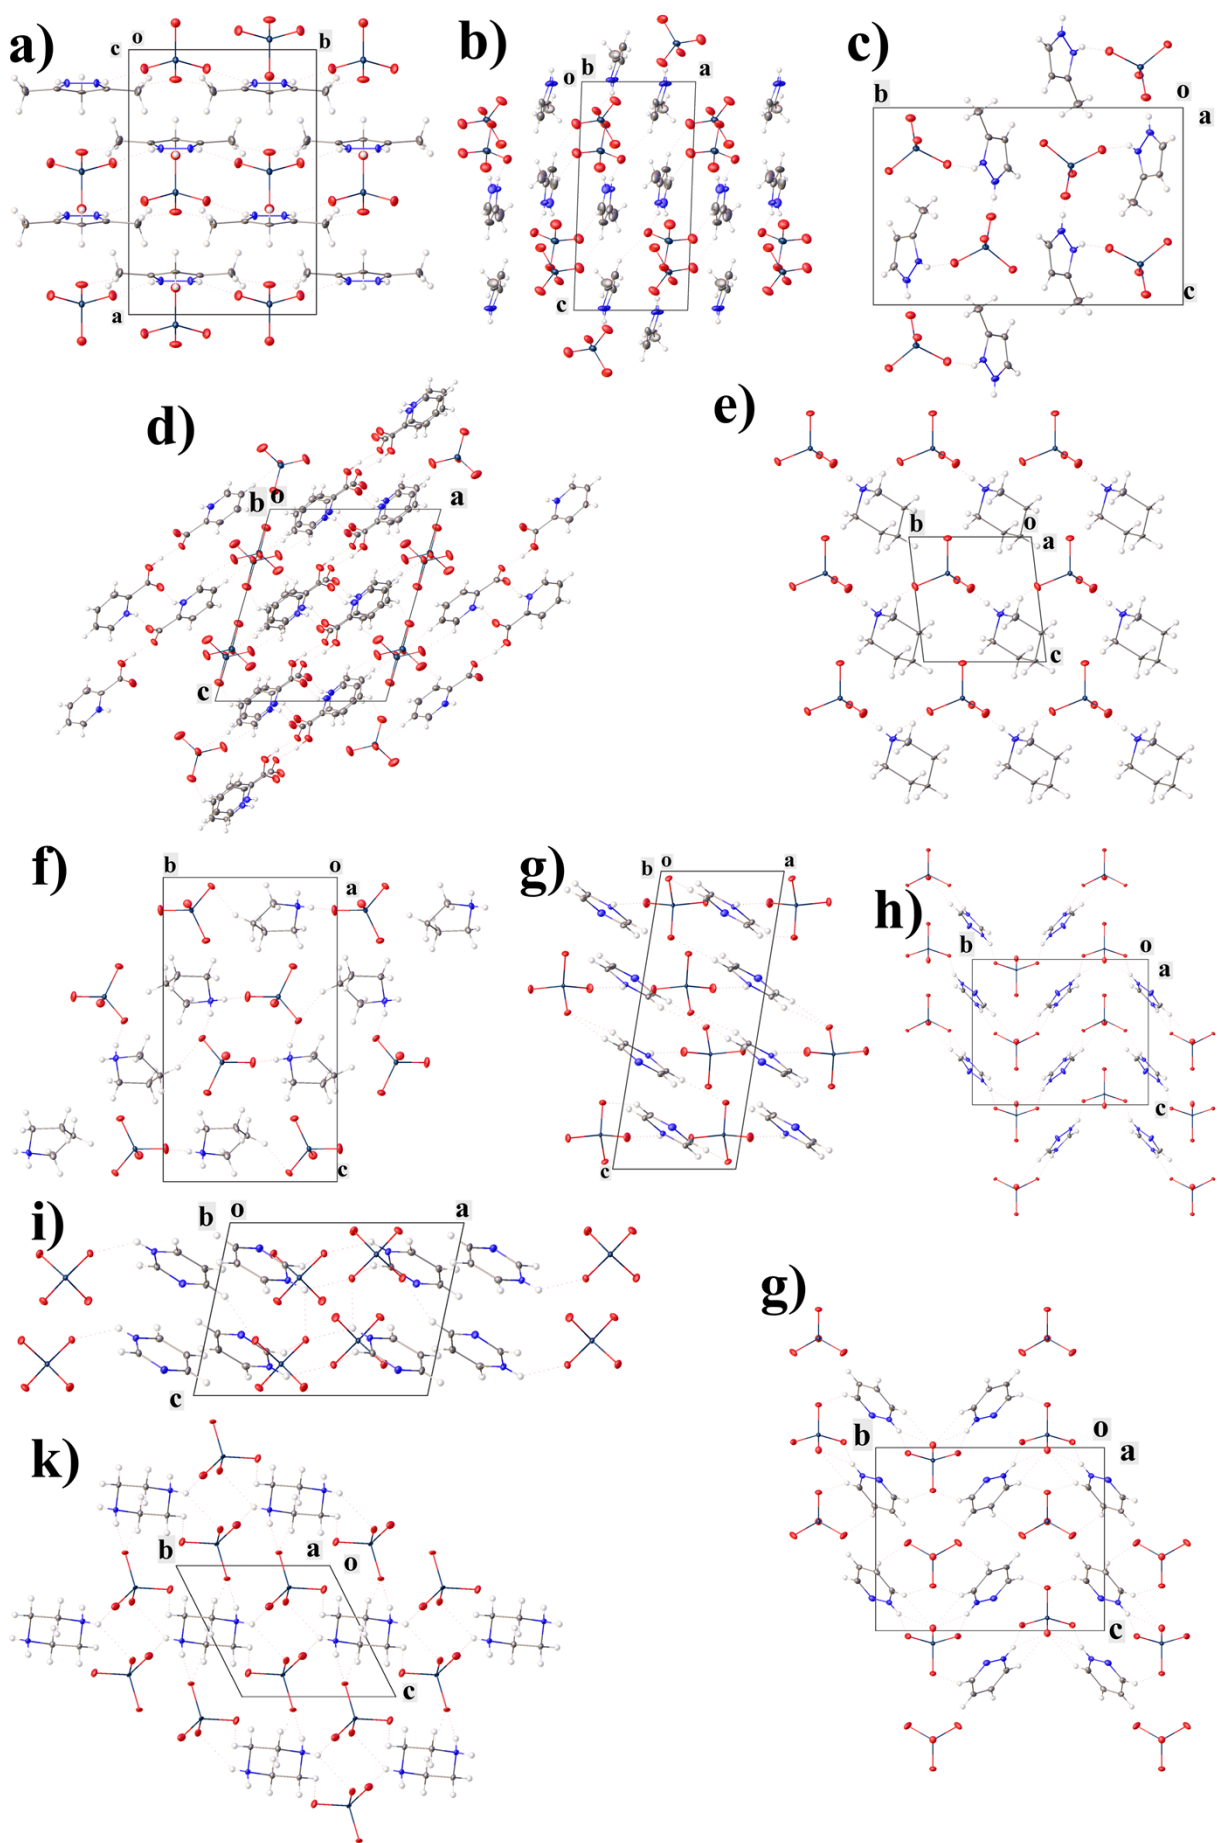

**Figure S2.** Crystal packing of 1 - 10 (a-k) showing cationic and anionic layers.

**Table S3.** Parameters of  $\pi$ -stacking interactions in **2a**.

| Ring 1               | Ring 2                        | Angle | Centroid-centroid distance | Shift distance |
|----------------------|-------------------------------|-------|----------------------------|----------------|
| C15N11N12C13C14<br>4 | C15N11N12C13C14 (-X,2-Y,1-Z)  | 0.000 | 3.657                      | 1.231          |
|                      | C15N11N12C13C14 (1-X,2-Y,1-Z) | 0.000 | 3.613                      | 1.691          |
| C15N11N12C13C14<br>4 | C15N11N12C13C14 (1-X,3-Y,2-Z) | 0.000 | 3.623                      | 1.434          |

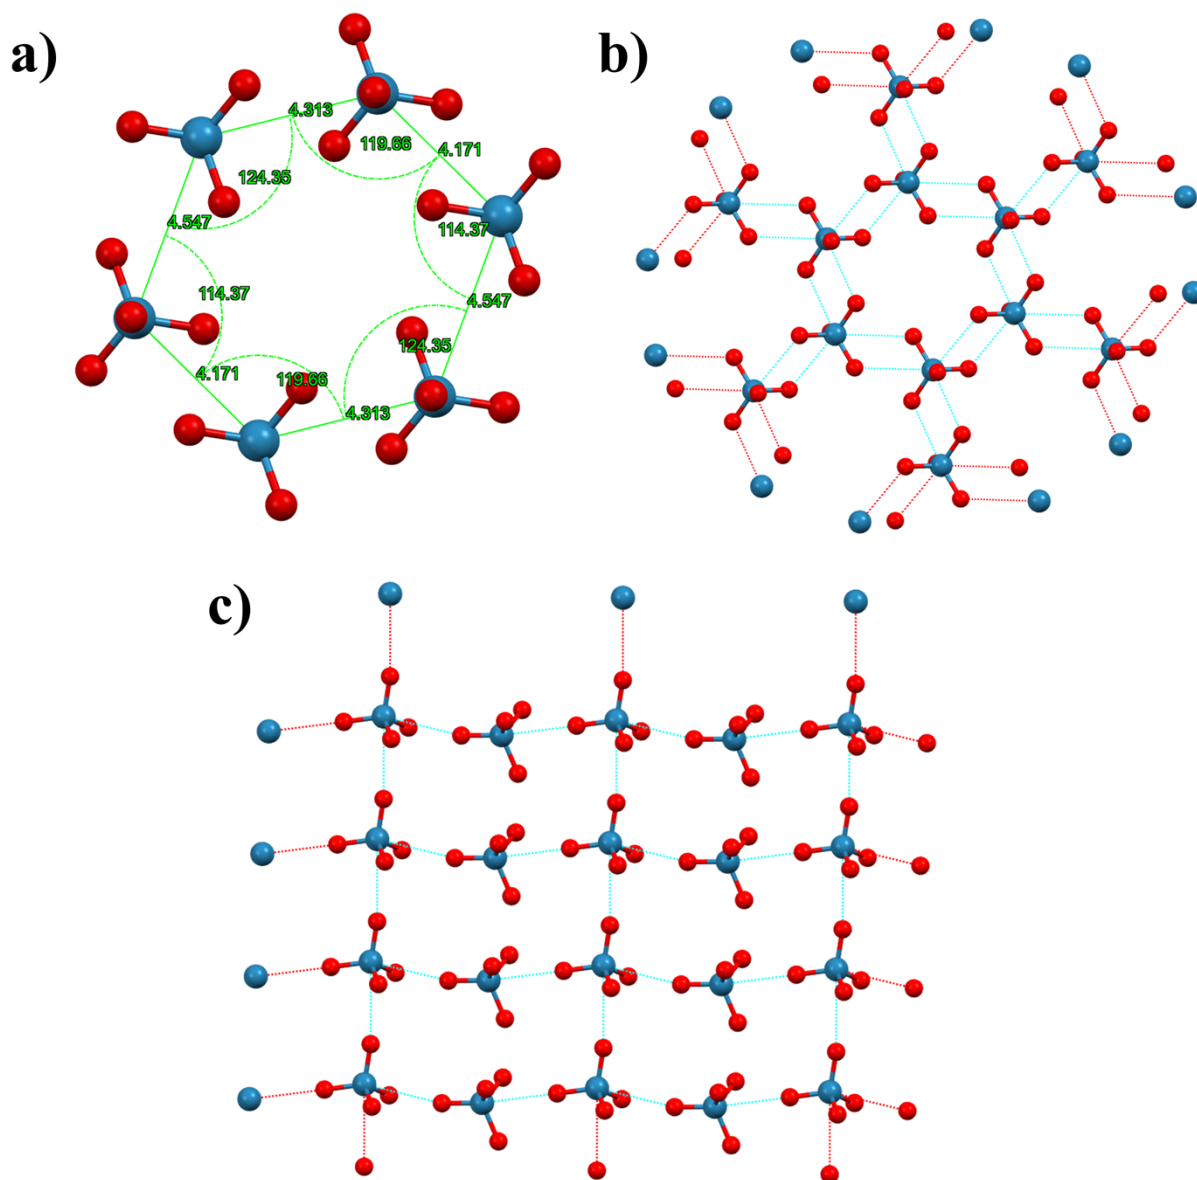

**Figure S3.** An elementary unit of a 2D network in **10** with distances and angles (a) and a fragment of a 2D anion network in **10** (b) and **7** (c).

## Powder X-ray diffraction (pXRD)

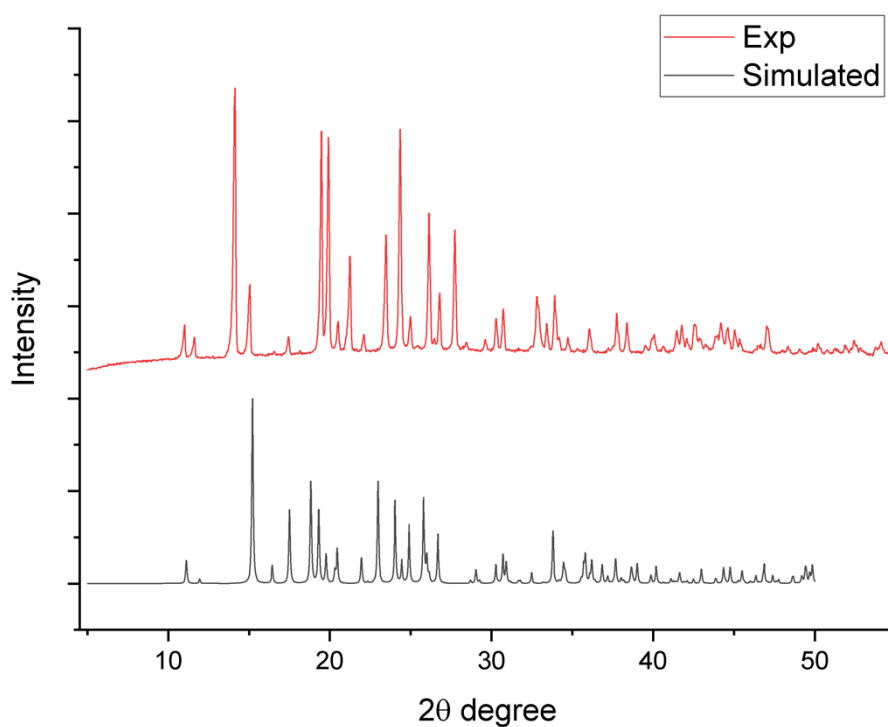

**Figure S4.** Experimental and theoretical X-ray phase patterns of dimethylpyrazolium perrhenate (compound 1)

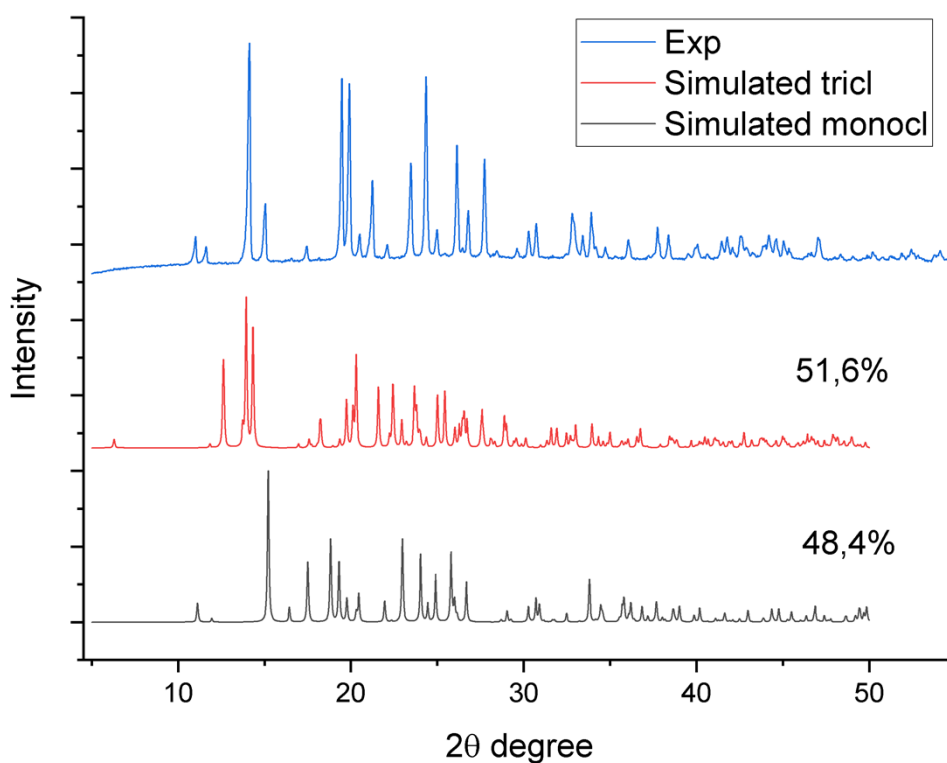

**Figure S5.** Experimental and theoretical X-ray phase patterns of 3-methylpyrazolium perrhenate (compound 2) with the percentage content of each phase.

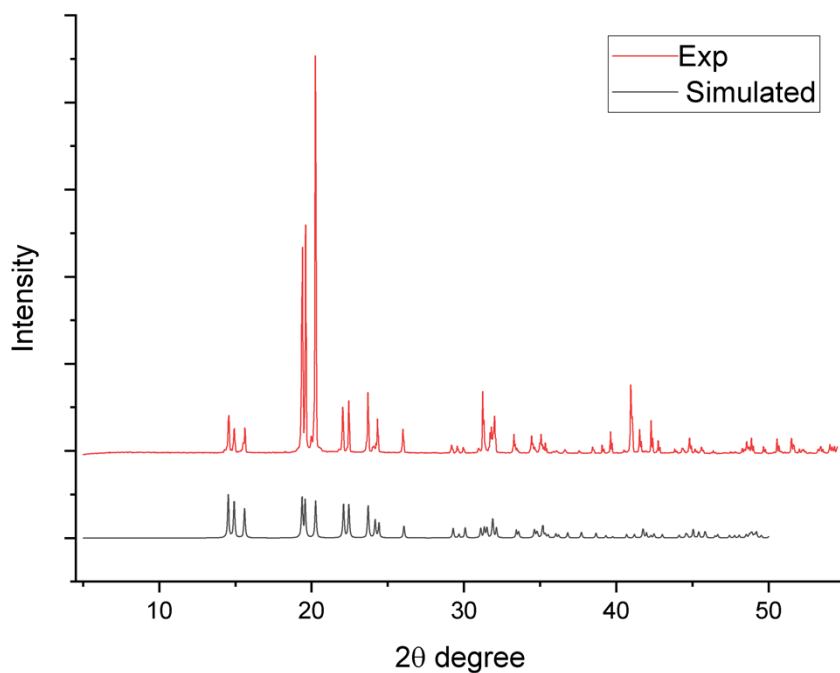

**Figure S6.** Experimental and theoretical X-ray phase patterns of picolinium perrhenate (compound 3)

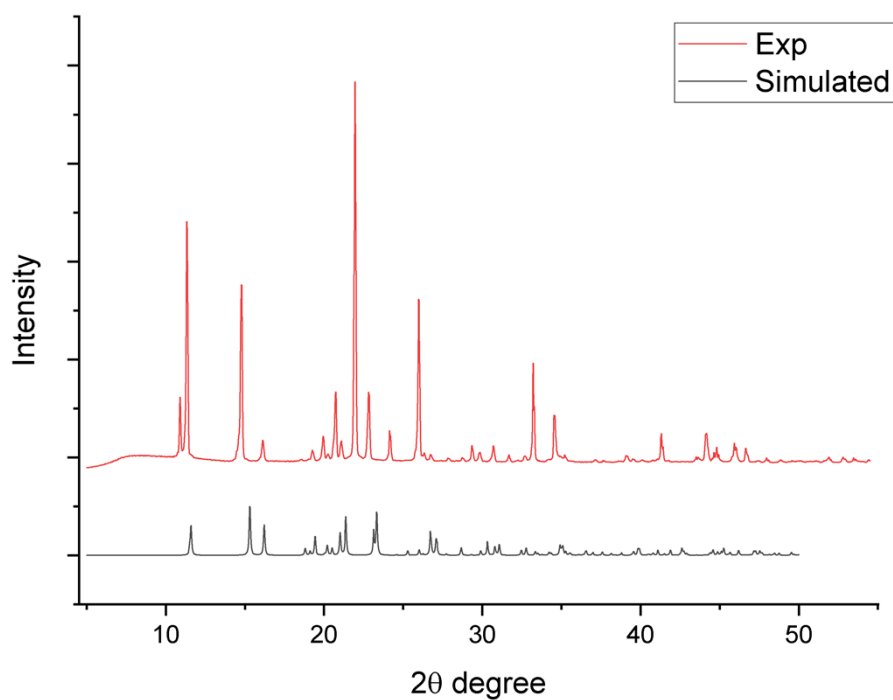

**Figure S7.** Experimental and theoretical X-ray phase patterns of piperidinium perrhenate (compound 4)



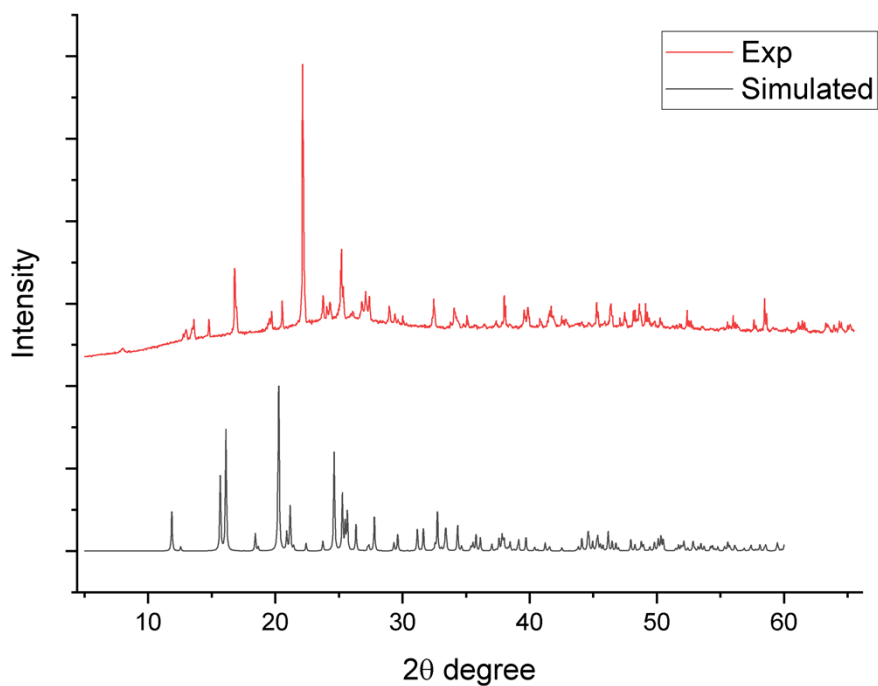

**Figure S8.** Experimental and theoretical X-ray phase patterns of pyrrolidinium perrhenate (compound **5**)

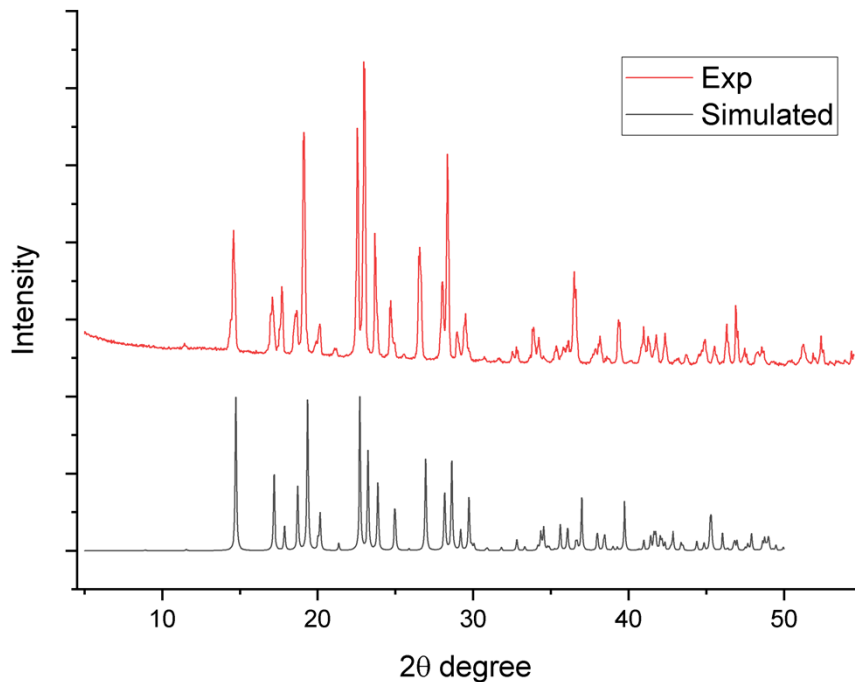

**Figure S9.** Experimental and theoretical X-ray phase patterns of pyrazinium perrhenate (compound **6**)

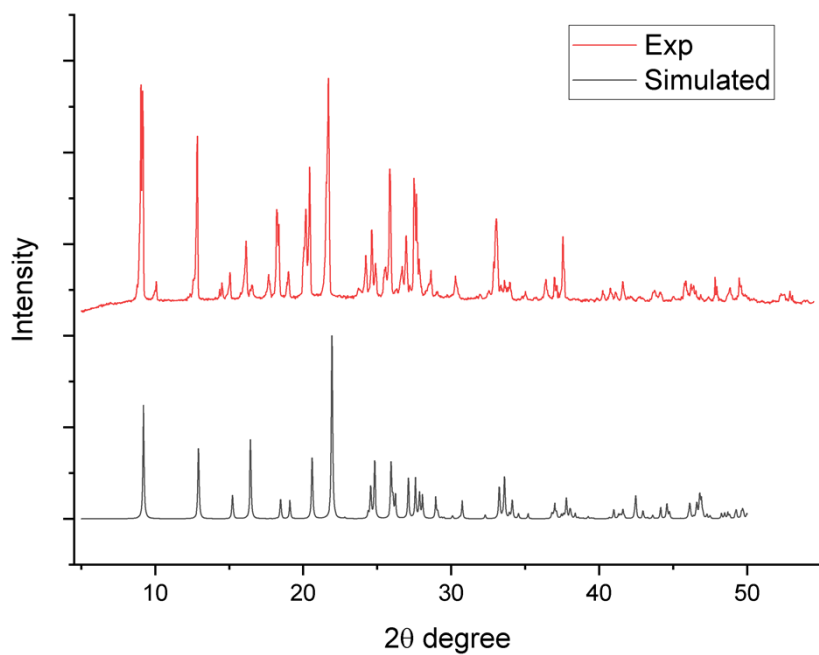

**Figure S10.** Experimental and theoretical X-ray phase patterns of triazolium perrhenate (compound **7**)

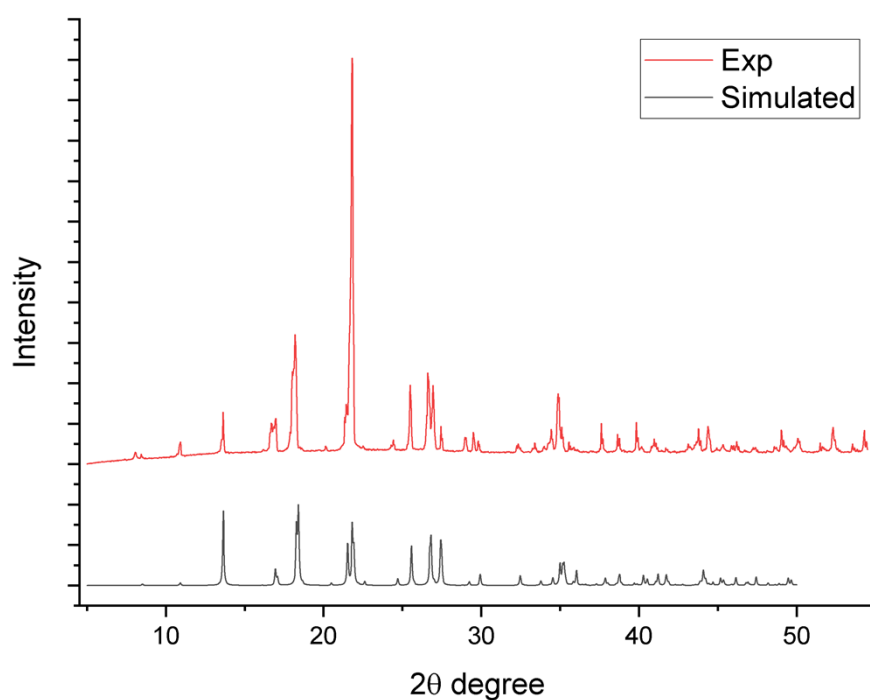

**Figure S11.** Experimental and theoretical X-ray phase patterns of pyrimidinium perrhenate (compound **8**)

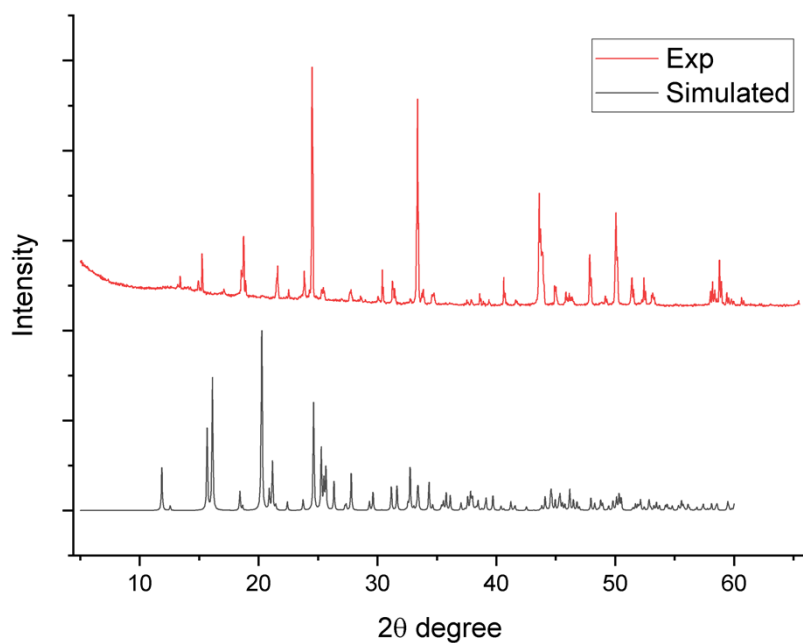

**Figure S12.** Experimental and theoretical X-ray phase patterns of pyridazinium perrhenate (compound **9**)

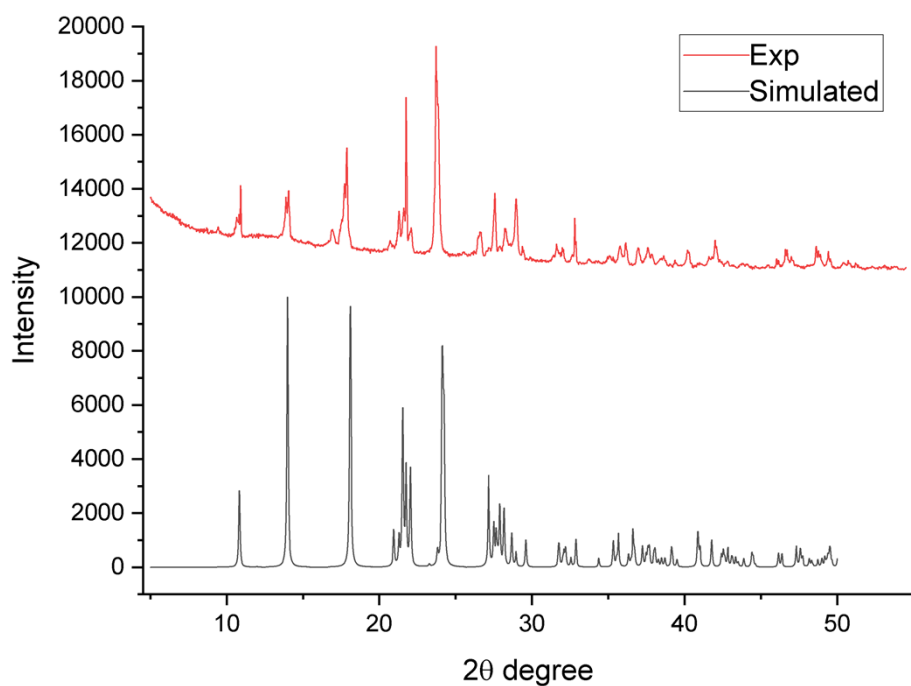

**Figure S13.** Experimental and theoretical X-ray phase patterns of piperazinium perrhenate (compound **10**)

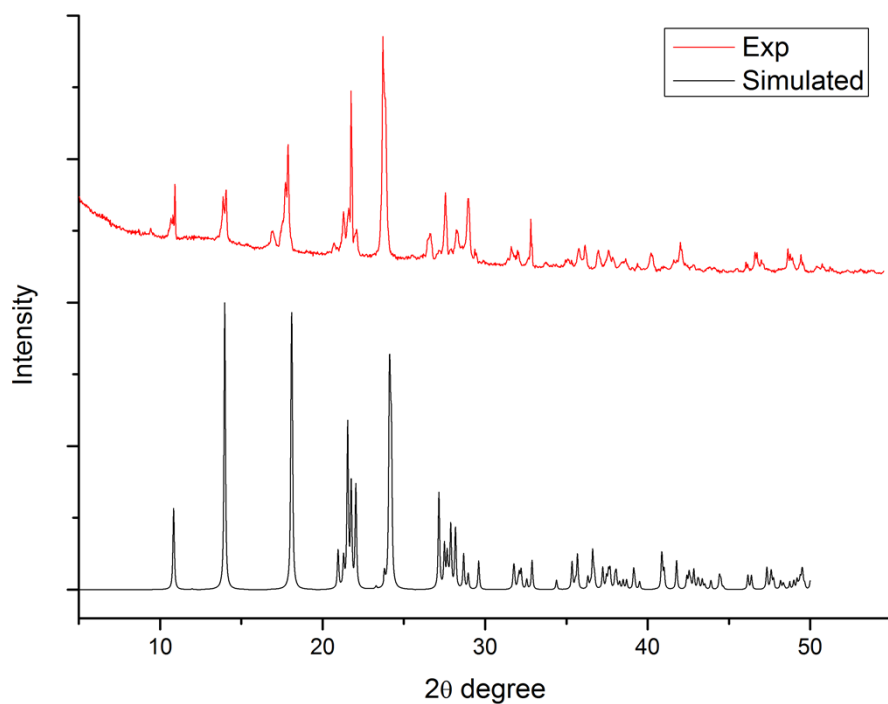

**Figure S14.** Experimental and theoretical X-ray phase patterns of guanidinium perrhenate (compound 11)

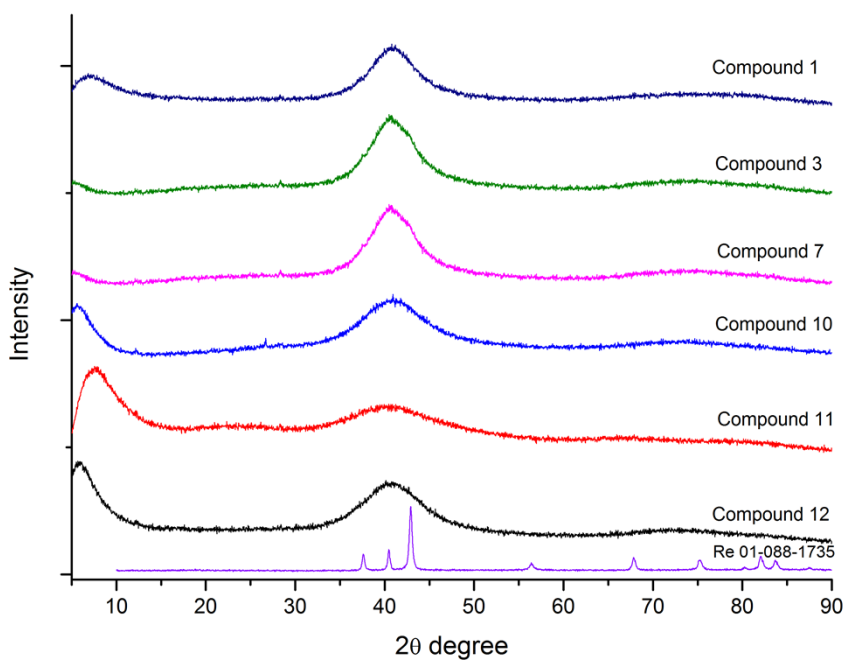

**Figure S15.** X-ray phase analysis of thermal decomposition products of compounds 1, 3, 7, 10, 11, 12 in comparison with metallic rhenium.

## MALDI-ToF

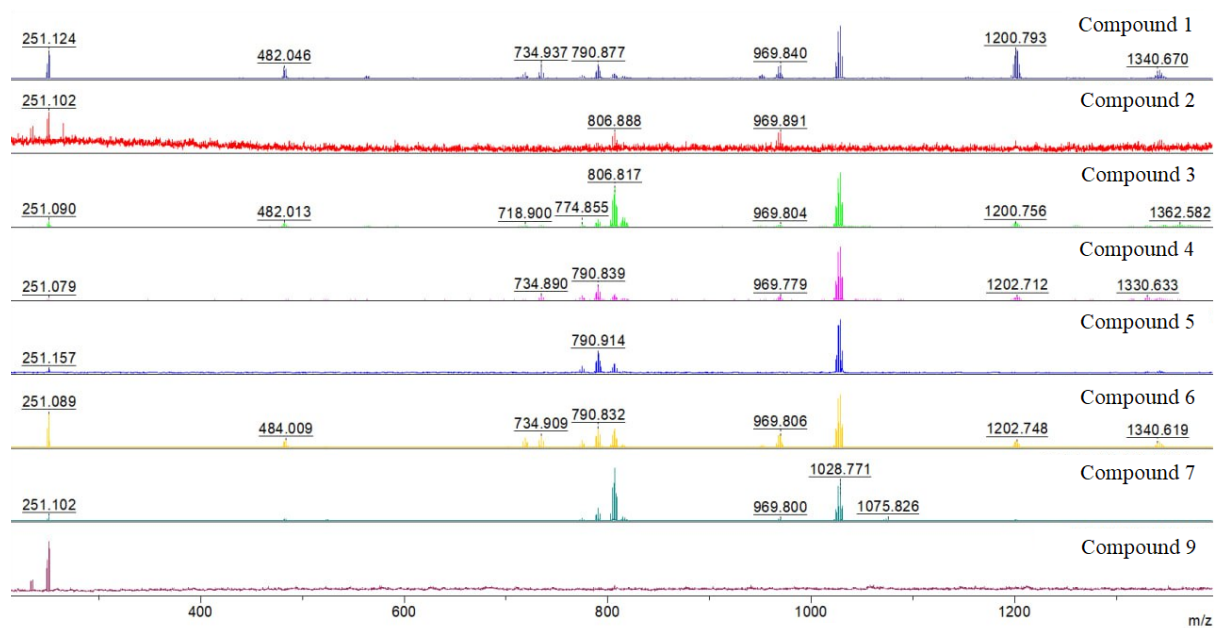

**Figure S16.** MALDI spectrometry of compounds **1-7** and **9** obtained for anions in reflex
